# Supplementary material for: Dielectric analysis of the percolation, interface polarization, and phase behavior of 1-butyl-3-methylimidazolium tetrafluoroborate/TX-100/triethylamine microemulsions
Source: Royal Society of Chemistry journal article supplement (doi:10.1039/d1nj02951g), 2021-01-01
Supplement: d1nj02951g1.pdf [file d1nj02951g1.pdf]

## Supplementary Information

Dielectric analysis of percolation, interface polarization, and phase behavior of 1-butyl-3-methylimidazolium tetrafluoroborate/TX-100/triethylamine microemulsions

*AUTHOR NAMES.* Zhen Li,<sup>a,b</sup> Zhefeng Fan,<sup>a\*</sup> Yiwei Lian<sup>b</sup> and Zhen Chen<sup>c</sup>

*AUTHOR ADDRESS.* <sup>a</sup> School of Chemistry and Material Science, Shanxi Normal University, Linfen, Shanxi, 041001, China; <sup>b</sup> Department of Applied Chemistry, School of Material Science and Engineering, Hebei University of Engineering, Handan, Hebei, 056038, China; <sup>c</sup> Department of Applied Chemistry, School of Science, Anhui Agricultural University, Hefei, Anhui, 230036, China.

\*Corresponding author. E-mail addresses: [zhefengfan@126.com](mailto:zhefengfan@126.com)

New Journal of Chemistry in which to be published.

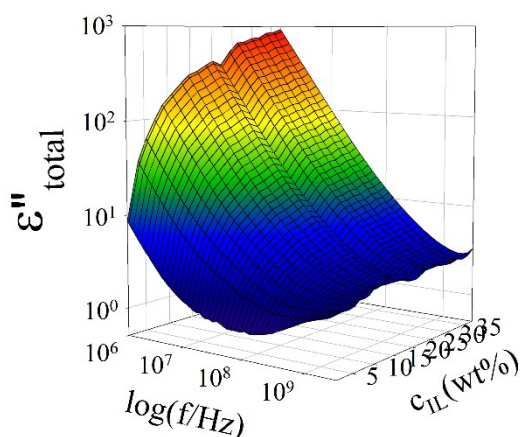

**Fig. S1.** Frequency dependences of the directly measured (total) dielectric loss for every sample.

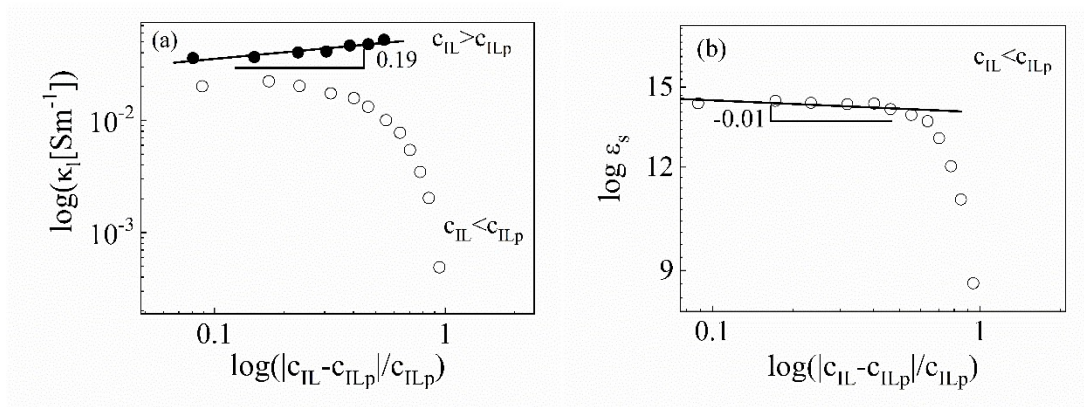

**Fig. S2.** (a) The fitting of data above percolation threshold gives  $\mu=0.19$ . (b) The fitting of data (10.87-0.22.21 wt%) gives  $s=0.01$ . Neither can be explained neither by the static nor by dynamic percolation model.
