# Supplementary figures and images for: Dielectric analysis of the percolation, interface polarization, and phase behavior of 1-butyl-3-methylimidazolium tetrafluoroborate/TX-100/triethylamine microemulsions
Source: Royal Society of Chemistry journal article supplement (doi:10.1039/d1nj02951g), 2021-01-01

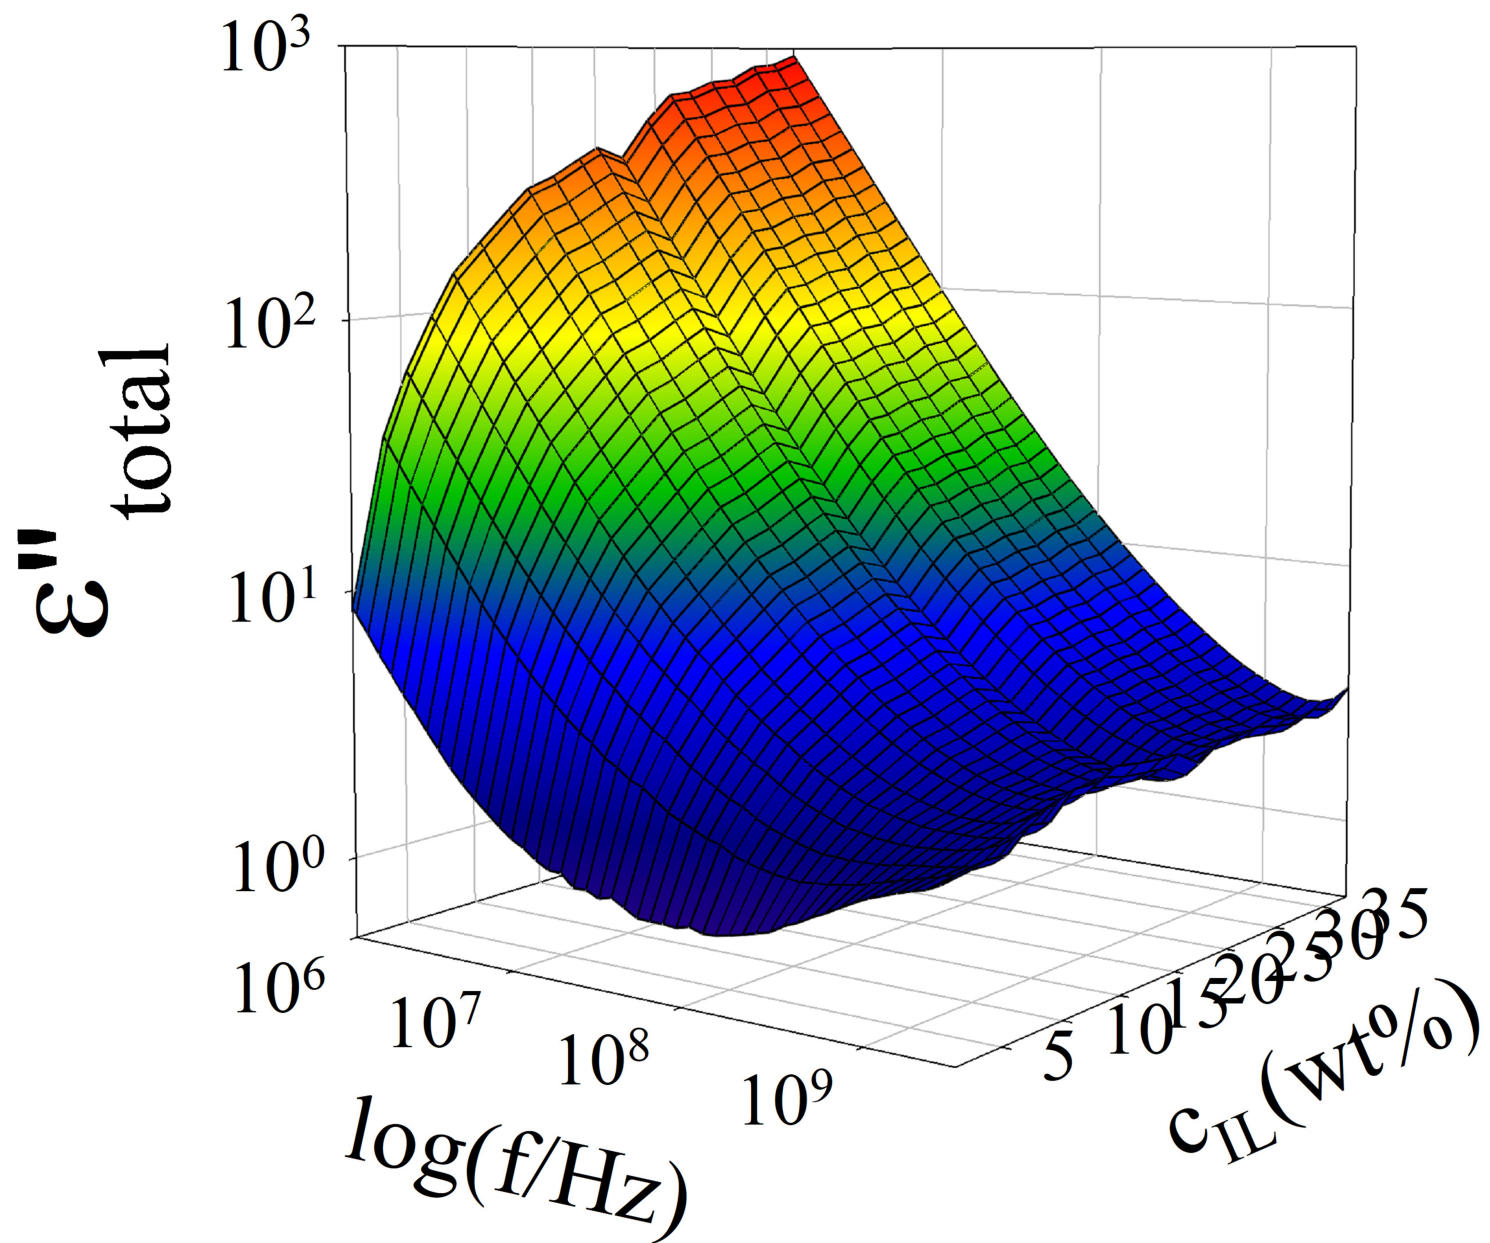

Supplement: d1nj02951g3.pdf [file d1nj02951g3.pdf]

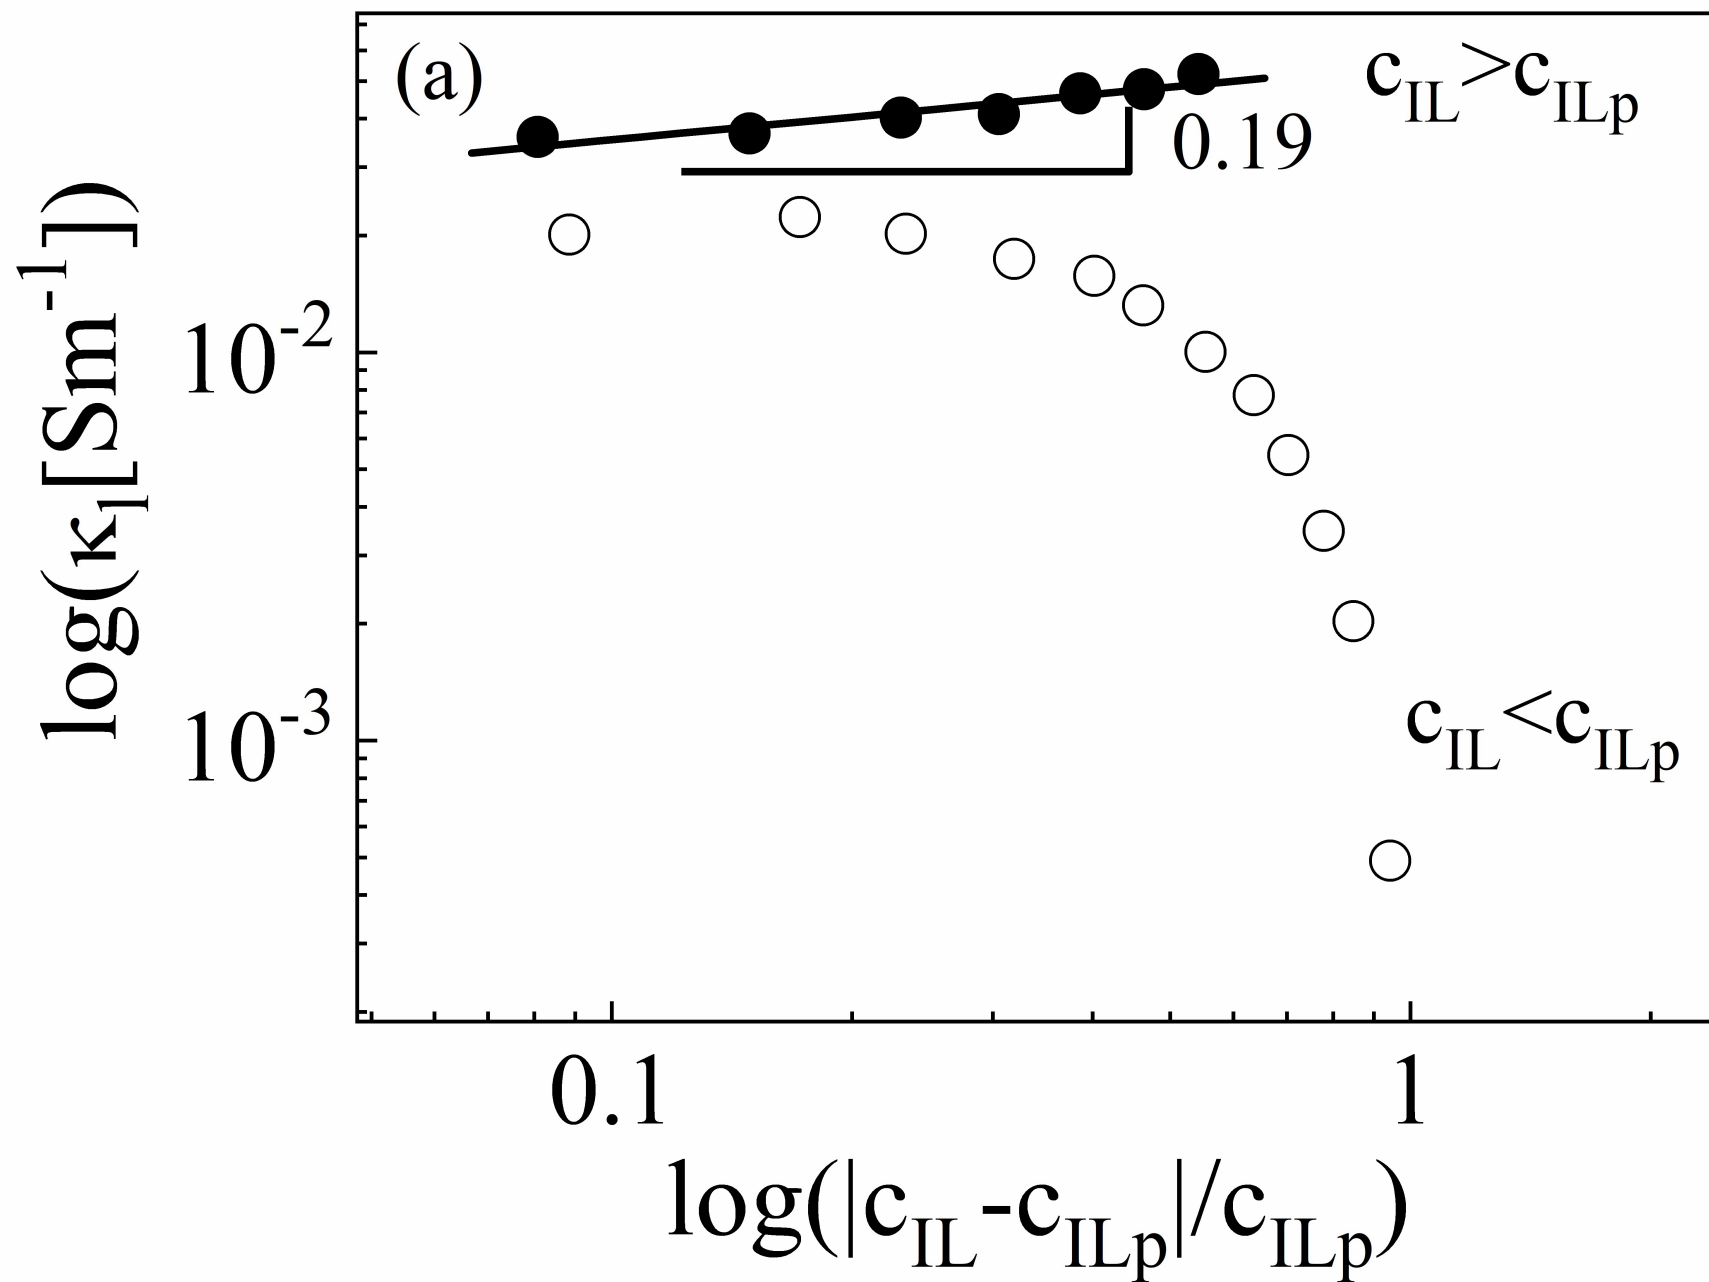

Supplement: d1nj02951g4.pdf [file d1nj02951g4.pdf]

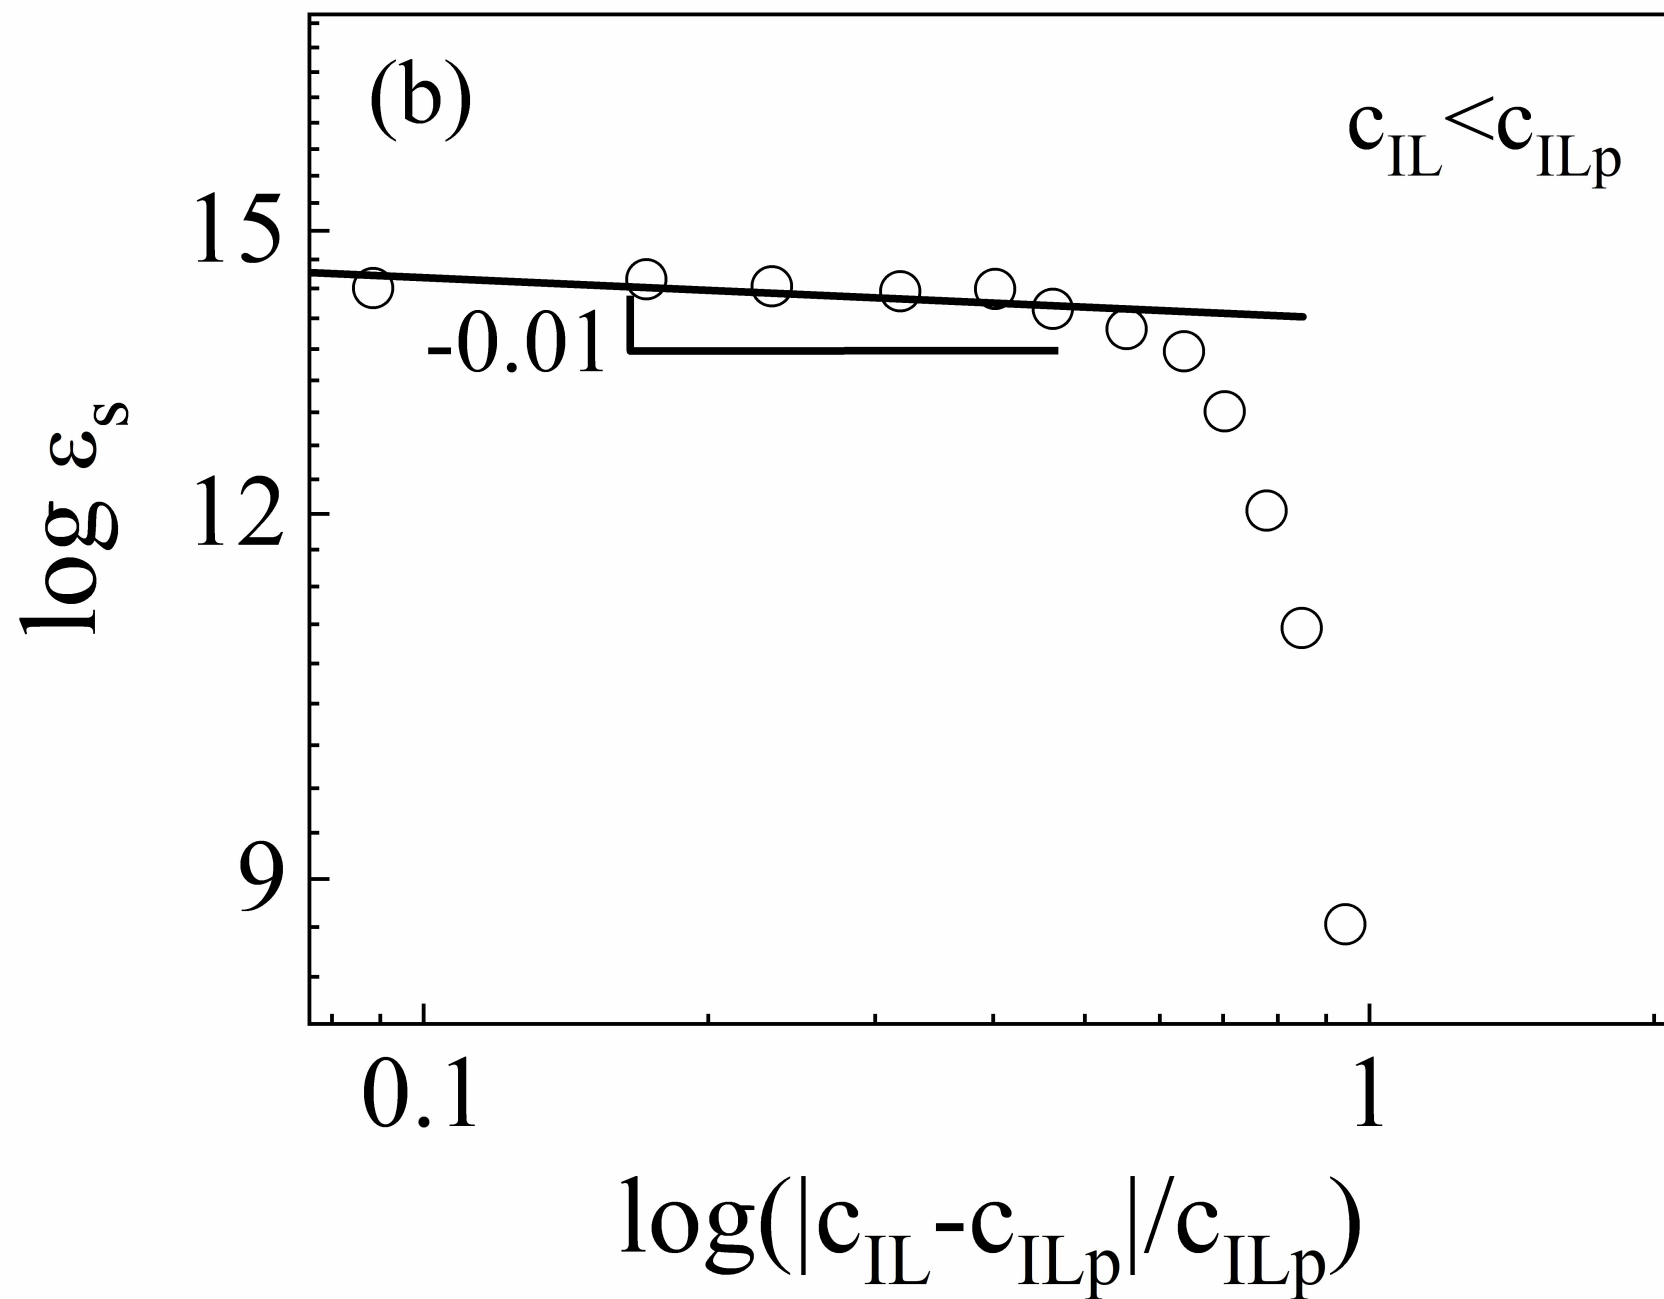

Supplement: d1nj02951g5.pdf [file d1nj02951g5.pdf]
